# Supplementary material for: Structure and membrane interactions of the β-amyloid fragment 25–35 as viewed using spectroscopic approaches
Source: Royal Society of Chemistry journal article supplement (doi:10.1039/c3cp44623a), 2013-01-01
Supplement: c3cp44623a.pdf [file c3cp44623a.pdf]

# **Supporting Information**

**Structure and membrane interactions of the  $\beta$ -amyloid fragment**

**25-35 as viewed by spectroscopic approaches**

Jean-François Labbé, Thierry Lefèvre, Andrée-Anne Guay-Bégin and Michèle Auger

**TABLE S1**

Solid-state  $^{13}\text{C}$  NMR parameters for  $\text{A}\beta_{25-35}$  in the absence and presence of membranes.

| <b>System</b>                                                                  | $\delta_{iso}^{13}\text{C}=\text{O}$<br><b>Ala-30</b><br><b>(ppm)</b> | $\delta_{iso}^{13}\text{CH}_{2\alpha}$<br><b>Gly-33</b><br><b>(ppm)</b> | $W_{1/2}^{13}\text{C}=\text{O}$<br><b>Ala-30</b><br><b>(Hz)</b> | $W_{1/2}^{13}\text{CH}_{2\alpha}$<br><b>Gly-33</b><br><b>(Hz)</b> | $T_2^{ZQ}$<br><b>(ms)</b> |
|--------------------------------------------------------------------------------|-----------------------------------------------------------------------|-------------------------------------------------------------------------|-----------------------------------------------------------------|-------------------------------------------------------------------|---------------------------|
| $\text{A}\beta\ 2\text{-}^{13}\text{C}$                                        | 173.6                                                                 | 43.7                                                                    | 191                                                             | 207                                                               | 3.2                       |
| $\text{A}\beta\ 2\text{-}^{13}\text{C}\ 5:1$                                   | 173.3                                                                 | 42.2                                                                    | 136                                                             | 208                                                               | 4.0                       |
| Lyophilized<br>DMPC/DMPG 4:1<br>+ $\text{A}\beta\ 2\text{-}^{13}\text{C}\ 5:1$ | 173.2                                                                 | 42.0                                                                    | 116                                                             | 151                                                               | 5.4                       |

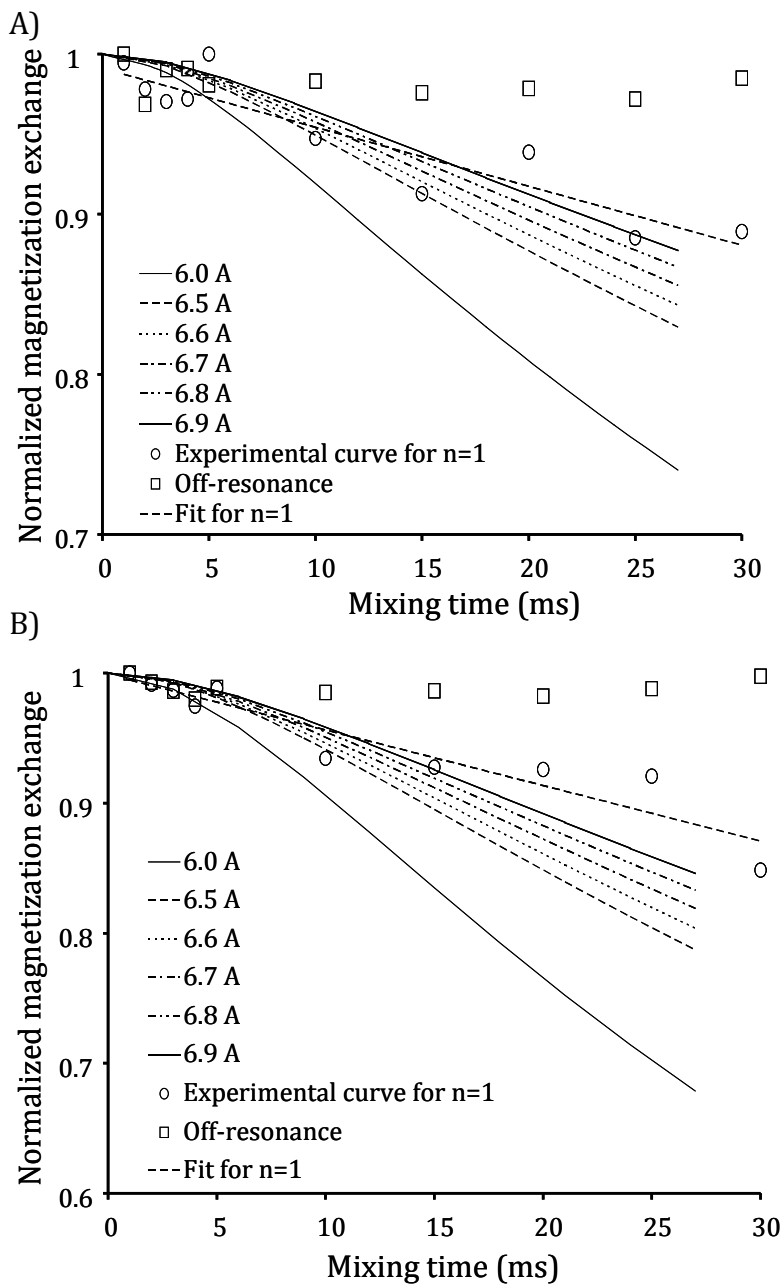

**FIGURE S1:**  $R^2$  magnetization exchange curves and simulations for A)  $A\beta_{25-35}$   $2-^{13}C$  isotopically diluted 5:1 and B) in the presence of DMPC/DMPG 4:1 at a lipid: peptide molar ratio of 5:1 at 24°C.
